# Supplementary material
Source: publisher site journal article supplement (https://www.dovepress.com/article/420001)
Supplement: Supplementary file 1 [file get_supplementary_file.php]

**Appendix 1. Chinese version of the IMAS**

| **項目** | |
| --- | --- |
| **AT1** | **我認為每天確實吸藥對於疾病控制是有幫助的。** |
| **AT2** | **我認為每天確實吸藥是重要而且必須要做的。** |
| **AT3** | **我認為每天確實吸藥能夠改善呼吸道(喘、咳)症狀。** |
| **AT4** | **我認為每天確實吸藥能夠減少呼吸困難發作的次數。** |
| **AT5** | **我認為每天確實吸藥能夠讓我更有信心出門。** |
| **AT6** | **我認為每天確實吸藥能夠讓我感覺精神變好。** |
| **AT7** | **我認為每天確實吸藥讓我比較不擔心呼吸困難發作。** |
| **AT8** | **我認為每天確實吸藥能夠提升我的生活品質。** |
| **AT9** | 我擔心藥物副作用對我的身體有危害。 |
| **AT10** | 我擔心每天吸藥會讓我開始依賴藥物。 |
| **AT11** | 我認為每天確實吸藥是一件很麻煩且費時的事情。 |
| **AT12** | 我認為沒有症狀就可以自行停藥 |
| **AT13** | **我認為每天確實吸藥對我的病情沒有幫助。** |
| **SN1** | 有配偶的鼓勵，我會每天確實吸藥 |
| **SN2** | 有親友的鼓勵，我會每天確實吸藥 |
| **SN3** | **有醫師的鼓勵，我會每天確實吸藥** |
| **SN4** | **有呼吸治療師或衛教師的鼓勵，我會每天確實吸藥** |
| **PBC1** | **我有能力不靠別人提醒就能每天確實吸藥。** |
| **PBC2** | **我有能力不靠別人協助就可以正確的吸藥。** |
| **PBC3** | **我有信心可以每天做到確實吸藥** |
| **PBC4** | **對我來說，每天確實吸藥是一件容易的事情** |
| **PBC5** | **只要我願意，就能把正確吸藥這件事情做好** |
| **PBC6** | 我是否每天確實吸藥完全取決於我自己不被別人影響 |
| **IT1** | 若醫師要求我每天確實吸藥，我會考慮並嘗試去做 |
| **IT2** | 若醫師要求我每天確實吸藥，我會每天確實做到 |
| **IT3** | **若醫師要求我明早開始吸藥我覺得晚一點再做也沒關係** |
| **IT4** | **醫師要求我早晚吸藥我覺得可以少吸一次藥也沒關係** |
| **IT5** | **若醫師要求我每天吸藥，我覺得偶爾不吸也沒有關係** |
| **Note:** Emboldened items are retained items.  **Abbreviations:** AT, attitude; SN, subjective norm; PBC, perceived behavioral control;IT, intention | |

**Appendix 2. English version of the IMAS**

| **Item** | |
| --- | --- |
| **AT1** | **I think that using inhaled medications every day is helpful for disease control.** |
| **AT2** | **I think that using inhaled medications every day is important and essential.** |
| **AT3** | **I think that using inhaled medications every day can improve respiratory symptoms (e.g., dyspnea, cough).** |
| **AT4** | **I think that using inhaled medications every day can reduce the frequency of dyspnea episodes.** |
| **AT5** | **I think that using inhaled medications every day gives me more confidence to go outside.** |
| **AT6** | **I think that using inhaled medications every day increases my energy.** |
| **AT7** | **I think that using inhaled medications every day makes me less worried about episodes of dyspnea.** |
| **AT8** | **I think that using inhaled medications every day improves my quality of life.** |
| **AT9** | I am worried that the inhaled medications side effects will harm my body. |
| **AT10** | I am worried that using inhaled medications every day will make me dependent on them. |
| **AT11** | I think that using the inhaled medications every day is troublesome and time wasting. |
| **AT12** | I think that I can stop using inhaled medications when I don't have any symptoms. |
| **AT13** | **I think that using the inhaled medications every day is not helpful for my condition.** |
| **SN1** | With the encouragement of my spouse, I use my inhaled medications every day |
| **SN2** | With the encouragement of friends and relatives, I use my inhaled medications every day |
| **SN3** | **With the encouragement of physicians, I use my inhaled medications every day** |
| **SN4** | **With the encouragement of respiratory therapist and educators, I use my inhaled medications every day** |
| **PBC1** | **I can use my inhaled medications every day without being reminded.** |
| **PBC2** | **I can use my inhaled medications every day without help from others.** |
| **PBC3** | **I am confident that I can use my inhaled medications every day** |
| **PBC4** | **It's easy for me to use my inhaled medications every day** |
| **PBC5** | **If I want to, I can do an excellent job using my inhaled medications every day.** |
| **PBC6** | I can use my inhaled medications every day without being influenced by others. |
| **IT1** | I will consider and try to use my inhaled medications every day if physicians ask me to do it. |
| **IT2** | I will use my inhaled medications every day if physicians ask me to do it. |
| **IT3** | **It doesn’t matter to be late to use my inhaled medications, even physicians ask me to do it next morning.** |
| **IT4** | **I think it's okay to use my inhaled medications one time less, even physicians ask me to do it twice a day.** |
| **IT5** | **I think it's okay not to use my inhaled medications from time to time, even physicians ask me to do it every day.** |
| **Note:** Emboldened items are the retained items.  **Abbreviations:** AT, attitude; SN, subjective norm; PBC, perceived behavioral control;IT, intention | |
